# Supplementary material
Source: PubMed Central journal article supplement (PMC7553012)
Supplement: NIHMS1632074-supplement-1.pdf [file NIHMS1632074-supplement-1.pdf]

**Supplemental Table 1.** Alzheimer's disease center sites stratified by ethnoracial group

| Site number | White | African American | Hispanic | Total |
|-------------|-------|------------------|----------|-------|
| 289         | 109   | 0                | 6        | 115   |
| 354         | 25    | 4                | 3        | 32    |
| 490         | 49    | 4                | 1        | 54    |
| 911         | 6     | 0                | 5        | 11    |
| 943         | 7     | 0                | 0        | 7     |
| 1354        | 31    | 0                | 4        | 35    |
| 1416        | 23    | 2                | 11       | 36    |
| 2096        | 299   | 20               | 3        | 322   |
| 2125        | 1     | 0                | 0        | 1     |
| 2289        | 129   | 8                | 28       | 165   |
| 2578        | 34    | 0                | 7        | 41    |
| 2933        | 5     | 0                | 0        | 5     |
| 2958        | 65    | 1                | 0        | 66    |
| 3630        | 7     | 1                | 0        | 8     |
| 3697        | 57    | 3                | 13       | 73    |
| 3964        | 1     | 0                | 0        | 1     |
| 3966        | 4     | 3                | 0        | 7     |
| 4032        | 29    | 1                | 2        | 32    |
| 4347        | 50    | 2                | 0        | 52    |
| 4935        | 22    | 5                | 14       | 41    |
| 4967        | 101   | 13               | 1        | 115   |
| 5310        | 6     | 0                | 0        | 6     |
| 5452        | 115   | 3                | 1        | 119   |
| 5783        | 26    | 0                | 0        | 26    |
| 5897        | 113   | 14               | 0        | 127   |
| 6061        | 38    | 2                | 2        | 42    |
| 6499        | 12    | 0                | 0        | 12    |
| 6518        | 48    | 11               | 7        | 66    |
| 6713        | 3     | 2                | 0        | 5     |

Running Title: Ethnoracial differences in LBD

---

|      |    |   |   |    |
|------|----|---|---|----|
| 8354 | 53 | 4 | 0 | 57 |
| 8361 | 76 | 0 | 9 | 85 |
| 8646 | 47 | 6 | 1 | 54 |
| 8658 | 52 | 9 | 0 | 61 |
| 8660 | 30 | 1 | 2 | 33 |
| 8683 | 13 | 2 | 0 | 15 |
| 8974 | 33 | 1 | 1 | 35 |
| 9637 | 51 | 5 | 1 | 57 |
| 9661 | 12 | 3 | 0 | 15 |

---

**Supplemental Table 2.** Linear regression of neuropsychological tests and sociodemographic variables for full sample

| Measure      | Predictor        | <i>B</i> | SE    | $\beta$ | <i>p</i> |
|--------------|------------------|----------|-------|---------|----------|
| MMSE         | Female           | -.112    | .227  | -.008   | .621     |
|              | Education        | .268     | .030  | .149    | <0.0001  |
|              | African American | -.751    | .406  | -.030   | .065     |
|              | Hispanic         | -.301    | .451  | -.011   | .504     |
|              | CDR GS           | -7.041   | .145  | -.75    | <0.0001  |
|              | Hypertension     | .066     | .206  | .005    | .748     |
|              | Diabetes         | -.022    | .313  | -.001   | .945     |
| DSF          | Female           | -.015    | .124  | -.025   | .904     |
|              | Education        | .105     | .016  | .159    | <0.0001  |
|              | African American | -.245    | .229  | -.025   | .284     |
|              | Hispanic         | -1.588   | .246  | -.157   | <0.0001  |
|              | CDR GS           | -1.455   | .092  | -.363   | <0.0001  |
|              | Hypertension     | -.104    | .112  | -.022   | .349     |
|              | Diabetes         | -.094    | .171  | -.013   | .580     |
| DSB          | Female           | .129     | .112  | .027    | .251     |
|              | Education        | .105     | .015  | .176    | <0.0001  |
|              | African American | -.630    | .208  | -.072   | .003     |
|              | Hispanic         | -.501    | .222  | -.055   | .024     |
|              | CDR GS           | -1.47    | .085  | -.399   | <0.0001  |
|              | Hypertension     | -.030    | .101  | -.007   | .766     |
|              | Diabetes         | .089     | .154  | .014    | .578     |
| Digit Symbol | Female           | 2.656    | .765  | .087    | .001     |
|              | Education        | .686     | .102  | .178    | <0.0001  |
|              | African American | -5.384   | 1.396 | -.097   | <0.0001  |
|              | Hispanic         | -2.442   | 1.518 | -.042   | .108     |
|              | CDR GS           | -12.098  | .677  | -.439   | <0.0001  |
|              | Hypertension     | -.694    | .683  | -.026   | .310     |
|              | Diabetes         | .139     | 1.023 | .003    | .892     |
| TMTA         | Female           | .290     | 2.095 | .003    | .890     |
|              | Education        | -1.190   | .280  | -.009   | <0.0001  |
|              | African American | 16.430   | 3.928 | .094    | <0.0001  |
|              | Hispanic         | 9.954    | 4.293 | .053    | .021     |
|              | CDR GS           | 40.627   | 1.886 | .470    | <0.0001  |
|              | Hypertension     | 1.339    | 1.860 | .016    | .472     |

Running Title: Ethnoracial differences in LBD

|                   |                  |        |        |       |         |
|-------------------|------------------|--------|--------|-------|---------|
|                   | Diabetes         | -.151  | 2.920  | -.001 | .959    |
| TMTB              | Female           | 2.539  | 5.603  | .013  | .651    |
|                   | Education        | -3.278 | .765   | -.121 | <0.0001 |
|                   | African American | 28.955 | 11.142 | .073  | .009    |
|                   | Hispanic         | 21.908 | 11.897 | .051  | .066    |
|                   | CDR GS           | 63.416 | 6.008  | .286  | <0.0001 |
|                   | Hypertension     | 6.056  | 4.905  | .034  | .217    |
|                   | Diabetes         | 5.476  | 7.900  | .019  | .488    |
| BNT               | Female           | -2.22  | .290   | -.156 | <0.0001 |
|                   | Education        | .295   | .038   | .166  | <0.0001 |
|                   | African American | -5.633 | .531   | -.217 | <0.0001 |
|                   | Hispanic         | -3.799 | .576   | -.139 | <0.0001 |
|                   | CDR GS           | -5.203 | .220   | -.470 | <0.0001 |
|                   | Hypertension     | -.165  | .261   | -.013 | .528    |
|                   | Diabetes         | -.023  | .400   | -.001 | .954    |
| Animals fluency   | Female           | -.178  | .272   | -.013 | .514    |
|                   | Education        | .148   | .036   | .089  | <0.0001 |
|                   | African American | -2.068 | .510   | -.084 | <0.0001 |
|                   | Hispanic         | -.781  | .543   | -.031 | .151    |
|                   | CDR GS           | -5.302 | .205   | -.521 | <0.0001 |
|                   | Hypertension     | -.247  | .244   | -.021 | .311    |
|                   | Diabetes         | 0.19   | .383   | .001  | .961    |
| Vegetable fluency | Female           | 1.532  | .192   | .168  | <0.0001 |
|                   | Education        | .032   | .026   | .028  | .212    |
|                   | African American | -.518  | .359   | -.030 | .149    |
|                   | Hispanic         | -1.045 | .385   | -.059 | .007    |
|                   | CDR GS           | -3.636 | .145   | -.514 | <0.0001 |
|                   | Hypertension     | -.101  | .171   | -.012 | .556    |
|                   | Diabetes         | .199   | .267   | .016  | .456    |
| Immediate memory  | Female           | .502   | .236   | .05   | .033    |
|                   | Education        | .244   | .031   | .190  | <0.0001 |
|                   | African American | -.204  | .434   | -.011 | .639    |
|                   | Hispanic         | -.074  | .467   | -.004 | .874    |
|                   | CDR GS           | -3.332 | .172   | -.440 | <0.0001 |
|                   | Hypertension     | -.075  | .212   | -.008 | .722    |
|                   | Diabetes         | .708   | .325   | .051  | .029    |

Running Title: Ethnoracial differences in LBD

|                |                  |        |      |       |         |
|----------------|------------------|--------|------|-------|---------|
| Delayed memory | Female           | .101   | .239 | .01   | .672    |
|                | Education        | .222   | .032 | .176  | <0.0001 |
|                | African American | -.341  | .435 | -.019 | .433    |
|                | Hispanic         | -.195  | .474 | -.01  | .680    |
|                | CDR GS           | -3.132 | .178 | -.410 | <0.0001 |
|                | Hypertension     | .009   | .214 | .001  | .965    |
|                | Diabetes         | .484   | .328 | .035  | .140    |

Abbreviation: MMSE, Mini-Mental Status Exam; DSF, Digit Span Forward; DSB, Digit Span Backward; TMTA, Trail Making

Test A, TMTB, Trail Making Test B; BNT, Boston Naming Test; CDR GS: CDR Global Score

\* White cohort was inputted as the referent group

**Supplemental Table 3.** Linear regression of neuropsychological tests and sociodemographic variables for dementia only sample

| Measure      | Predictor        | <i>B</i> | SE    | $\beta$ | <i>p</i> |
|--------------|------------------|----------|-------|---------|----------|
| MMSE         | Female           | -1.075   | .455  | -.073   | .018     |
|              | Education        | .413     | .060  | .223    | <0.0001  |
|              | African American | -1.056   | .792  | -.041   | .183     |
|              | Hispanic         | .039     | .845  | .001    | .964     |
|              | Hypertension     | -.219    | .416  | -.016   | .599     |
|              | Diabetes         | .129     | .641  | .006    | .841     |
| DSF          | Female           | -.122    | .171  | -.023   | .477     |
|              | Education        | .117     | .022  | .178    | <0.0001  |
|              | African American | -.491    | .309  | -.051   | .113     |
|              | Hispanic         | -1.445   | .312  | -.154   | <0.0001  |
|              | Hypertension     | -.114    | .153  | -.024   | .457     |
|              | Diabetes         | .107     | .240  | .014    | .657     |
| DSB          | Female           | .058     | .144  | -.013   | .688     |
|              | Education        | .099     | .019  | .181    | <0.0001  |
|              | African American | -.670    | .263  | -.083   | .011     |
|              | Hispanic         | -.336    | .264  | -.043   | .202     |
|              | Hypertension     | -.054    | .130  | -.014   | .675     |
|              | Diabetes         | .180     | .203  | .030    | .375     |
| Digit Symbol | Female           | 1.291    | 1.029 | .047    | .210     |
|              | Education        | .553     | .134  | .163    | <0.0001  |
|              | African American | -5.443   | 1.841 | -.110   | .003     |
|              | Hispanic         | -1.985   | 1.849 | -.042   | .283     |
|              | Hypertension     | -1.403   | .906  | -.058   | .122     |

Running Title: Ethnoracial differences in LBD

|                   |                  |         |        |       |        |
|-------------------|------------------|---------|--------|-------|--------|
|                   | Diabetes         | 1.659   | 1.381  | .046  | .230   |
| TMTA              | Female           | 2.581   | 3.222  | .027  | .423   |
|                   | Education        | -1.065  | .426   | -.087 | .013   |
|                   | African American | 22.531  | 5.861  | .128  | .0001  |
|                   | Hispanic         | 5.552   | 6.153  | .031  | .367   |
|                   | Hypertension     | 2.336   | 2.846  | .027  | .412   |
|                   | Diabetes         | -4.581  | 4.509  | -.034 | .310   |
| TMTB              | Female           | 16.189  | 7.550  | .089  | .032   |
|                   | Education        | -1.443  | 1.036  | -.059 | .164   |
|                   | African American | 29.590  | 15.013 | .082  | .049   |
|                   | Hispanic         | -10.379 | 14.531 | -.029 | .475   |
|                   | Hypertension     | 9.223   | 6.503  | .058  | .157   |
|                   | Diabetes         | -2.505  | 10.474 | -.010 | .811   |
| BNT               | Female           | -2.963  | .463   | -.193 | <.0001 |
|                   | Education        | .346    | .060   | .183  | <.0001 |
|                   | African American | -6.067  | .830   | -.220 | <.0001 |
|                   | Hispanic         | -4.029  | .850   | -.148 | <.0001 |
|                   | Hypertension     | -.707   | .417   | -.051 | .090   |
|                   | Diabetes         | .095    | .648   | .004  | .883   |
| Animals fluency   | Female           | -.717   | .364   | -.061 | .049   |
|                   | Education        | .179    | .048   | .122  | .0002  |
|                   | African American | -2.211  | .662   | -.103 | .001   |
|                   | Hispanic         | -.639   | .676   | -.030 | .344   |
|                   | Hypertension     | -.435   | .327   | -.041 | .183   |
|                   | Diabetes         | .352    | .519   | .021  | .498   |
| Vegetable fluency | Female           | .927    | .259   | .112  | .0004  |
|                   | Education        | .035    | .034   | .033  | .314   |
|                   | African American | -.563   | .472   | -.038 | .233   |
|                   | Hispanic         | -.894   | .485   | -.060 | .066   |
|                   | Hypertension     | -.495   | .232   | -.067 | .033   |
|                   | Diabetes         | .575    | .364   | .051  | .114   |
| Immediate memory  | Female           | .069    | .291   | .008  | .813   |
|                   | Education        | .234    | .038   | .213  | <.0001 |
|                   | African American | -.033   | .527   | -.002 | .951   |
|                   | Hispanic         | .048    | .529   | .003  | .928   |

Running Title: Ethnoracial differences in LBD

|                |                  |       |      |       |         |
|----------------|------------------|-------|------|-------|---------|
|                | Hypertension     | -.261 | .261 | -.033 | .317    |
|                | Diabetes         | .912  | .408 | .075  | .026    |
| Delayed memory | Female           | -.391 | .272 | -.048 | .151    |
|                | Education        | .182  | .036 | .178  | <0.0001 |
|                | African American | -.207 | .486 | -.014 | .669    |
|                | Hispanic         | -.035 | .496 | -.002 | .944    |
|                | Hypertension     | -.285 | .245 | -.039 | .244    |
|                | Diabetes         | .592  | .380 | .052  | .120    |

Abbreviation: MMSE, Mini-Mental Status Exam; DSF, Digit Span Forward; DSB, Digit Span Backward; TMTA, Trail Making

Test A, TMTB, Trail Making Test B; BNT, Boston Naming Test

\* White cohort was inputted as the referent group

\*\* Sample was defined using clinical/consensus diagnosis of dementia

**Supplemental Table 4.** Linear regression of neuropsychological tests and sociodemographic variables for MCI only sample

| Measure      | Predictor        | <i>B</i> | SE    | $\beta$ | <i>p</i> |
|--------------|------------------|----------|-------|---------|----------|
| MMSE         | Female           | .597     | .226  | .112    | .009     |
|              | Education        | .167     | .031  | .241    | <0.0001  |
|              | African American | -.732    | .433  | -.072   | .092     |
|              | Hispanic         | -.561    | .545  | -.044   | .303     |
|              | Hypertension     | -.121    | .202  | -.026   | .549     |
|              | Diabetes         | -.593    | .300  | -.083   | .049     |
| DSF          | Female           | .048     | .196  | .010    | .809     |
|              | Education        | .098     | .027  | .162    | .0003    |
|              | African American | .179     | .373  | .021    | .631     |
|              | Hispanic         | -2.109   | .470  | -.194   | <0.0001  |
|              | Hypertension     | -.242    | .176  | -.059   | .169     |
|              | Diabetes         | -.440    | .260  | -.071   | .091     |
| DSB          | Female           | .331     | .193  | .074    | .088     |
|              | Education        | .119     | .026  | .203    | <0.0001  |
|              | African American | -.668    | .367  | -.079   | .069     |
|              | Hispanic         | -.974    | .463  | -.092   | .036     |
|              | Hypertension     | -.077    | .173  | -.019   | .657     |
|              | Diabetes         | -.179    | .256  | -.030   | .484     |
| Digit Symbol | Female           | 4.219    | 1.120 | .164    | .0002    |
|              | Education        | .862     | .154  | .251    | <0.0001  |
|              | African American | -6.245   | 2.095 | -.131   | .003     |

Running Title: Ethnoracial differences in LBD

|                   |                  |        |        |       |         |
|-------------------|------------------|--------|--------|-------|---------|
|                   | Hispanic         | -3.253 | 2.681  | -.053 | .226    |
|                   | Hypertension     | -.563  | 1.015  | -.024 | .579    |
|                   | Diabetes         | -2.680 | 1.491  | -.077 | .073    |
| TMTA              | Female           | -.260  | 2.200  | -.005 | .906    |
|                   | Education        | -1.034 | .299   | -.142 | .001    |
|                   | African American | 10.317 | 4.311  | .096  | .017    |
|                   | Hispanic         | 19.024 | 5.095  | .151  | .0002   |
|                   | Hypertension     | 1.027  | 1.955  | .021  | .599    |
|                   | Diabetes         | 6.068  | 3.034  | .078  | .046    |
| TMTB              | Female           | -7.673 | 7.684  | -.041 | .318    |
|                   | Education        | -4.507 | 1.042  | -.179 | <0.0001 |
|                   | African American | 43.726 | 15.231 | .118  | .004    |
|                   | Hispanic         | 67.681 | 18.356 | .149  | .0002   |
|                   | Hypertension     | 1.587  | 6.792  | .010  | .815    |
|                   | Diabetes         | 17.292 | 10.920 | .064  | .114    |
| BNT               | Female           | -1.246 | .350   | -.138 | .0004   |
|                   | Education        | .260   | .047   | .222  | <0.0001 |
|                   | African American | -5.268 | .665   | -.311 | <0.0001 |
|                   | Hispanic         | -3.742 | .837   | -.177 | <0.0001 |
|                   | Hypertension     | .254   | .313   | .032  | .417    |
|                   | Diabetes         | -.111  | .469   | -.009 | .813    |
| Animals fluency   | Female           | .241   | .460   | .021  | .601    |
|                   | Education        | .128   | .062   | .085  | .041    |
|                   | African American | -2.606 | .908   | -.116 | .004    |
|                   | Hispanic         | -1.015 | 1.073  | -.039 | .344    |
|                   | Hypertension     | -.186  | .408   | -.018 | .649    |
|                   | Diabetes         | -.752  | .632   | -.047 | .235    |
| Vegetable fluency | Female           | 2.250  | .308   | .285  | <0.0001 |
|                   | Education        | .049   | .042   | .047  | .245    |
|                   | African American | -.822  | .606   | -.054 | .175    |
|                   | Hispanic         | -1.503 | .715   | -.083 | .036    |
|                   | Hypertension     | .466   | .273   | .067  | .088    |
|                   | Diabetes         | -.637  | .424   | -.058 | .133    |
| Immediate memory  | Female           | 1.059  | .427   | .109  | .013    |
|                   | Education        | .268   | .058   | .208  | <0.0001 |

Running Title: Ethnoracial differences in LBD

|                |                  |        |       |       |         |
|----------------|------------------|--------|-------|-------|---------|
|                | African American | -.790  | .805  | -.044 | .327    |
|                | Hispanic         | .294   | 1.048 | .012  | .779    |
|                | Hypertension     | .003   | .380  | .000  | .994    |
|                | Diabetes         | .244   | .568  | .019  | .668    |
| Delayed memory | Female           | .709   | .452  | .069  | .117    |
|                | Education        | .292   | .061  | .214  | <0.0001 |
|                | African American | -1.041 | .854  | -.054 | .223    |
|                | Hispanic         | -.097  | 1.11  | -.004 | .930    |
|                | Hypertension     | .333   | .403  | .037  | .408    |
|                | Diabetes         | -.006  | .602  | .000  | .992    |

Abbreviation: MMSE, Mini-Mental Status Exam; DSF, Digit Span Forward; DSB, Digit Span Backward; TMTA, Trail Making

Test A, TMTB, Trail Making Test B; BNT, Boston Naming Test

\* White cohort was inputted as the referent group

\*\* Sample was defined using clinical/consensus diagnosis of MCI
